# Supplementary material
Source: bioRxiv or medRxiv preprint supplement (https://medrxiv.org/highwire/filestream/94584/field_highwire_adjunct_files/1/2020.08.24.20180653-2.pdf)
Supplement: Supplementary file [file 2020.08.24.20180653-2.pdf]

Supplementary table B: Adaptation of models and tools for validation against the current dataset

| Variables               | Model 1 [winemaker]                                                                                              | Tool 1 [RAPT; oldmeadow]                                                                                                                            | Model 2 [oldmeadow]                                                                                         | Tool 2 [gabriel]                                                             | Model 3 [gabriel]                                        |
|-------------------------|------------------------------------------------------------------------------------------------------------------|-----------------------------------------------------------------------------------------------------------------------------------------------------|-------------------------------------------------------------------------------------------------------------|------------------------------------------------------------------------------|----------------------------------------------------------|
| Model/tool structure    | No change                                                                                                        | No change                                                                                                                                           | Converted to generalized logistic regression                                                                | No change                                                                    | Converted to generalized logistic regression             |
| Outcome                 | Collapsed 3 categories ( $\leq 3$ days, 4 days; $\geq 5$ days) into binary response ( $< 5$ days; $\geq 5$ days) | Exchanged <i>high risk for discharge to facility</i> for target Los $\geq 5$ days<br>Used threshold of 9 to be high risk category for $> 5$ day LoS | Binary outcome (discharge home; discharge facility) changed to binary response ( $< 5$ days; $\geq 5$ days) | Cutoff for high risk of extended LoS ( $\geq 5$ days) changed from 12 to 9.5 | No change - binary response ( $\leq 3$ days; $> 3$ days) |
| Age                     | No change                                                                                                        | Added $< 50$ category - allocated score of 3                                                                                                        | Added $< 50$ category                                                                                       | No change                                                                    | No change                                                |
| Gender                  | No change                                                                                                        | No change                                                                                                                                           | No change                                                                                                   | No change                                                                    | No change                                                |
| Joint                   | No change                                                                                                        |                                                                                                                                                     |                                                                                                             |                                                                              |                                                          |
| ASA rating              | No change                                                                                                        |                                                                                                                                                     |                                                                                                             |                                                                              |                                                          |
| No. CV comorbidities    | No change                                                                                                        |                                                                                                                                                     |                                                                                                             |                                                                              |                                                          |
| No. renal comorbidities | Changed from count to binary (yes; no)                                                                           |                                                                                                                                                     |                                                                                                             |                                                                              |                                                          |
| Current smoker          | No change*                                                                                                       |                                                                                                                                                     |                                                                                                             |                                                                              |                                                          |
| Diabetes oral treatment | Changed to presence of diabetes (yes; no) but not oral treatment status                                          |                                                                                                                                                     |                                                                                                             |                                                                              |                                                          |

|                                       |           |                                                                                                   |                                           |                                      |                                          |
|---------------------------------------|-----------|---------------------------------------------------------------------------------------------------|-------------------------------------------|--------------------------------------|------------------------------------------|
| Musculoskeletal comorbidities         | No change |                                                                                                   |                                           |                                      |                                          |
| Mobility/Walking distance             |           | Added a category for <i>missing data</i> - allocated a score of 1                                 | Added a category for <i>missing data</i>  |                                      |                                          |
| Gait aids                             |           | Collapsed responses into binary (yes; no); allocated scores of 2 to <i>no</i> and 1 to <i>yes</i> | Collapsed responses into binary (yes; no) |                                      |                                          |
| Community support                     |           | Not available in current dataset                                                                  | Not available in current dataset          |                                      |                                          |
| Caregiver availability                |           | No change                                                                                         | No change                                 |                                      |                                          |
| Opioid usage                          |           |                                                                                                   |                                           | Changed to binary response (yes; no) | Changed to binary response (yes; no)     |
| Preoperative METs                     |           |                                                                                                   |                                           | No change                            | Added a category for <i>missing data</i> |
| Neuraxial anaesthesia                 |           |                                                                                                   |                                           | Not included (not preoperative)      | Not included (not preoperative)          |
| Preoperative anemia status            |           |                                                                                                   |                                           | No change                            | No change                                |
| COPD status                           |           |                                                                                                   |                                           | No change                            | No change                                |
| Hypertension                          |           |                                                                                                   |                                           | No change                            | No change                                |
| Obesity (BMI $\geq 30\text{kg/m}^2$ ) |           |                                                                                                   |                                           | No change                            | No change                                |

\* blank responses in free-text comorbidities field assumed to be absence of smoking
